# Supplementary material
Source: Springer Nature journal article supplement (https://www.springermedizin.de/resource/supplementary/12958_2009_551_MOESM3_ESM.pdf/9568294)
Supplement: MOESM3 [file 9568294]

# low and high molecular weight kininogens

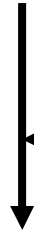

serine proteases:  
tissue kallikrein,  
plasma kallikrein

bradykinin

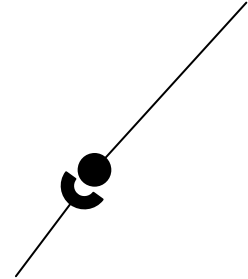

**B1R**

(type 1 receptor)

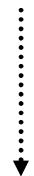

*Pain, mitogenesis,  
angiogenesis*

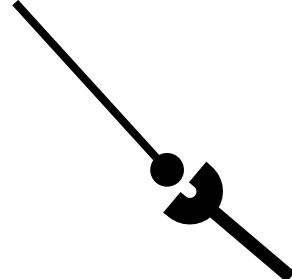

**B2R**

(type 2 receptor)

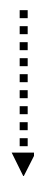

***Vasodilation***  
*Hyperpermeability  
antiaggregation*
